# Supplementary material for: Molecular basis of engineered meganuclease targeting of the endogenous human RAG1 locus
Source: PubMed Central journal article supplement — Nucleic Acids Res. 2010 Sep 16;39(2):729–43. doi: 10.1093/nar/gkq801 (PMC3025557; doi:10.1093/nar/gkq801), 2010-09-16

Suppl. Fig. 1

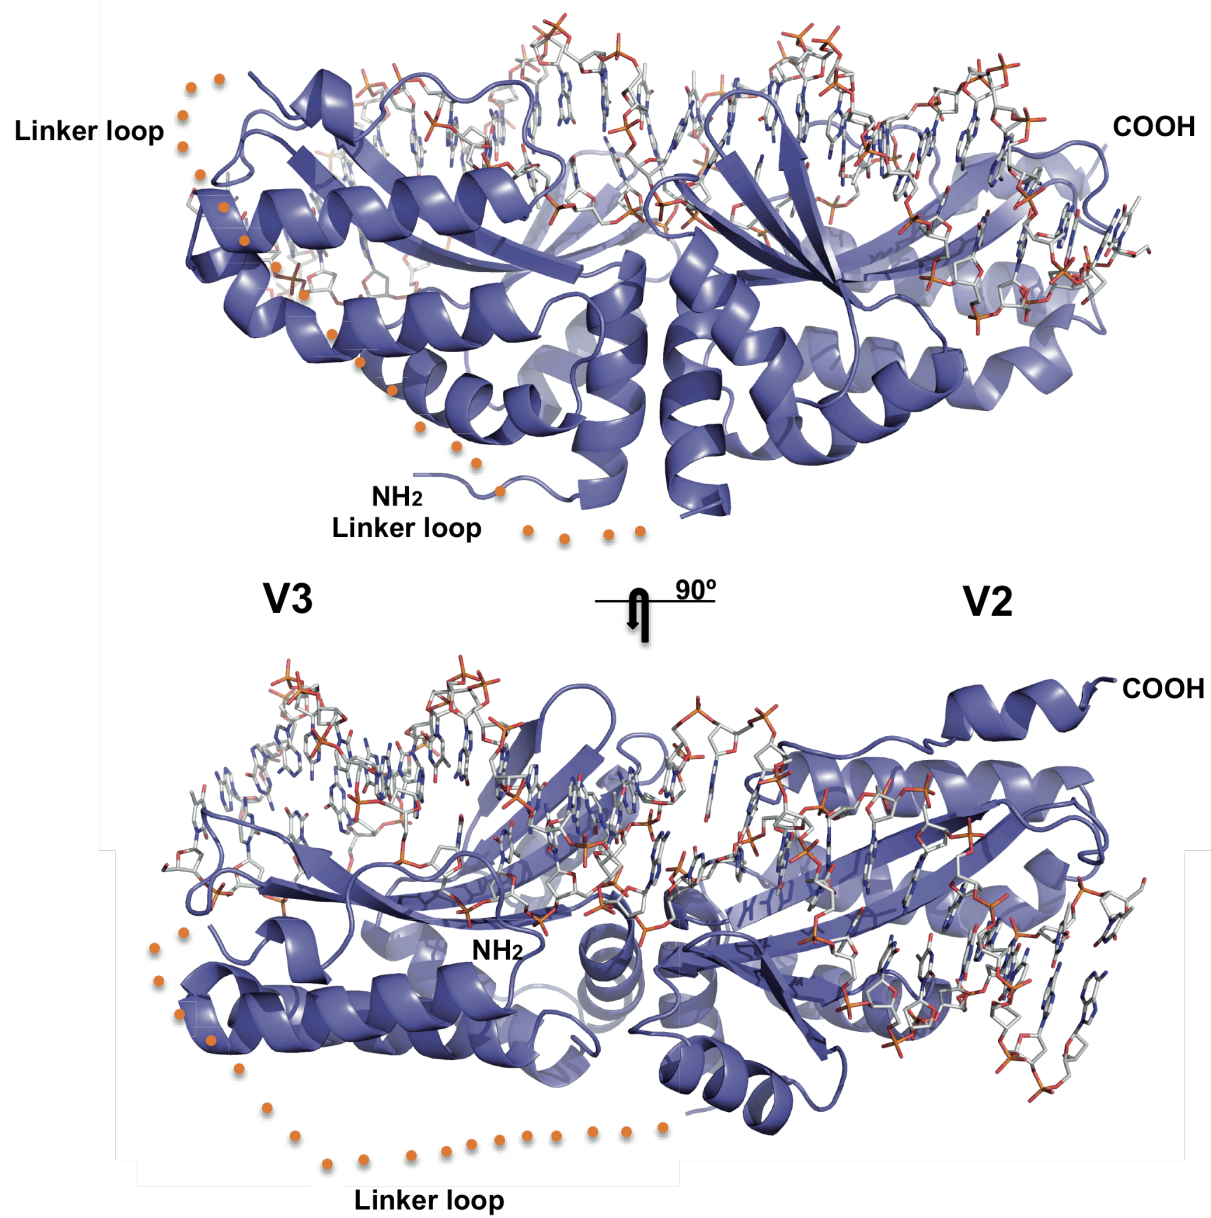



Suppl fig 2

V2(K7E-G19S)/V3(E8K) Ca<sup>2+</sup>

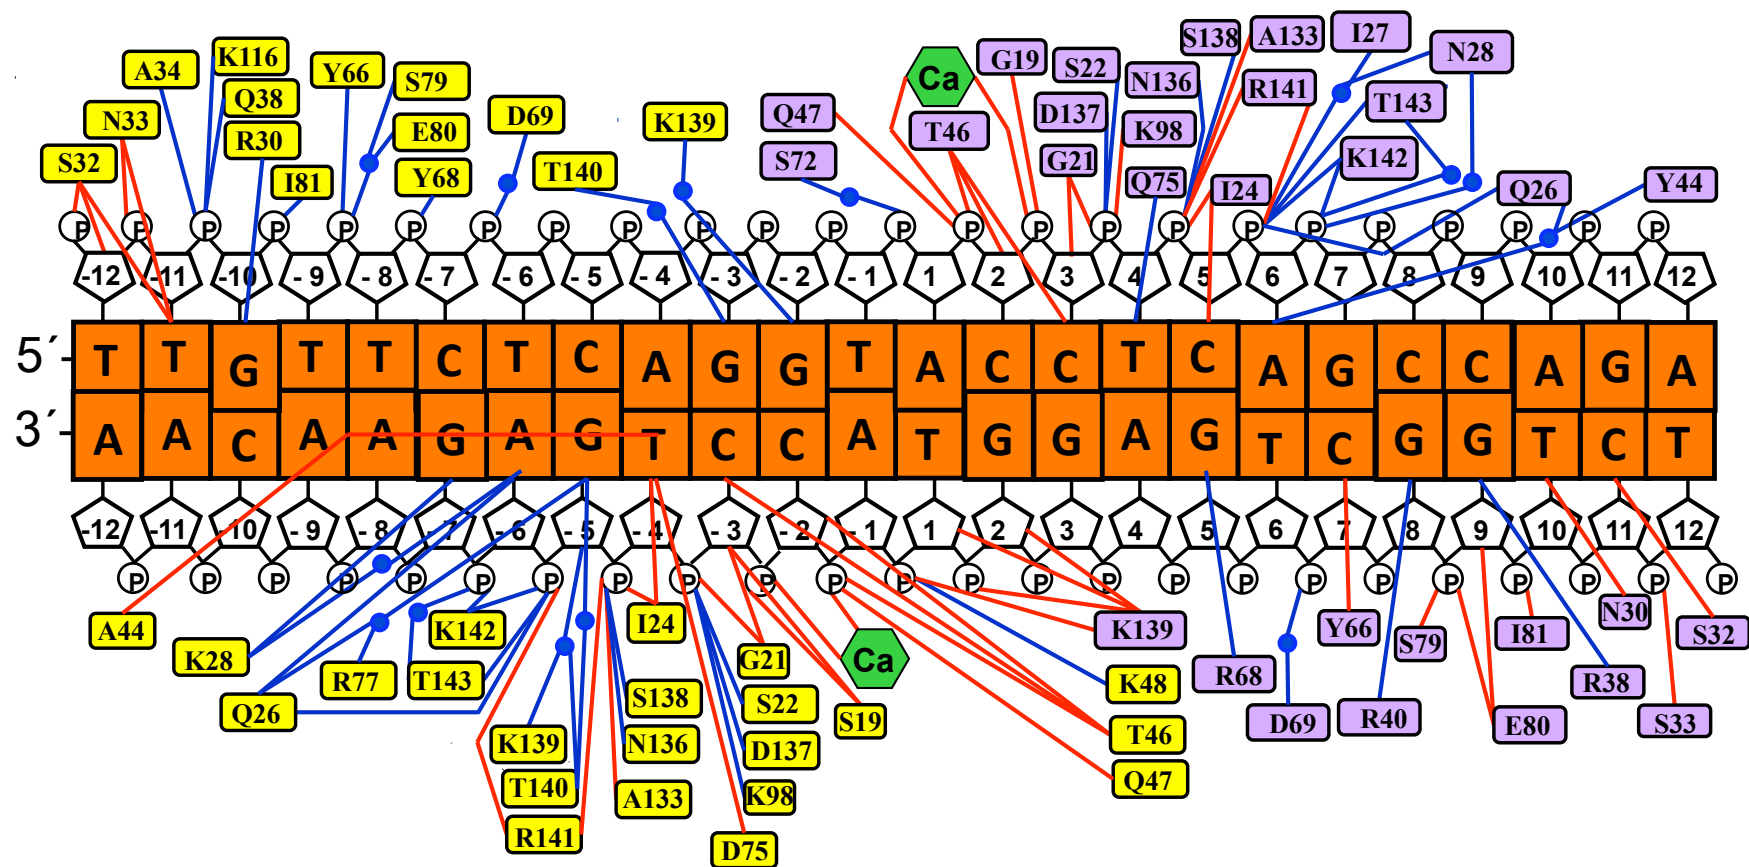





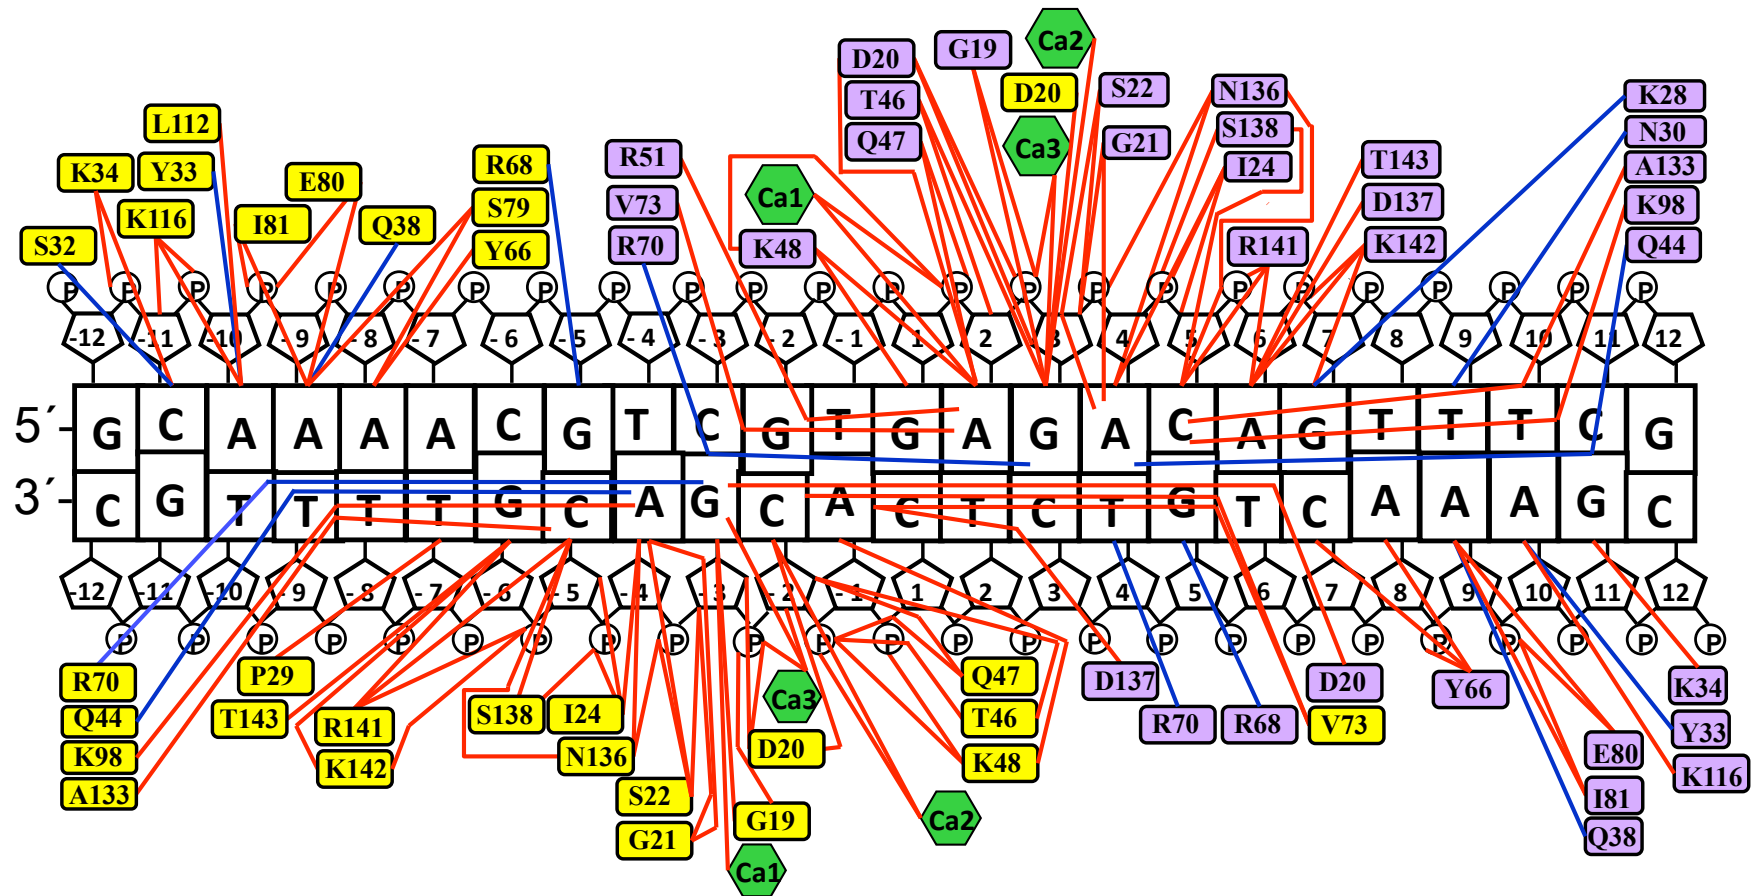

# Suppl fig 3

Hydrogen bond

van der Waals contact to base

Hydrogen bond & van der Waals contact to base

## I-Crel Ca<sup>2+</sup>

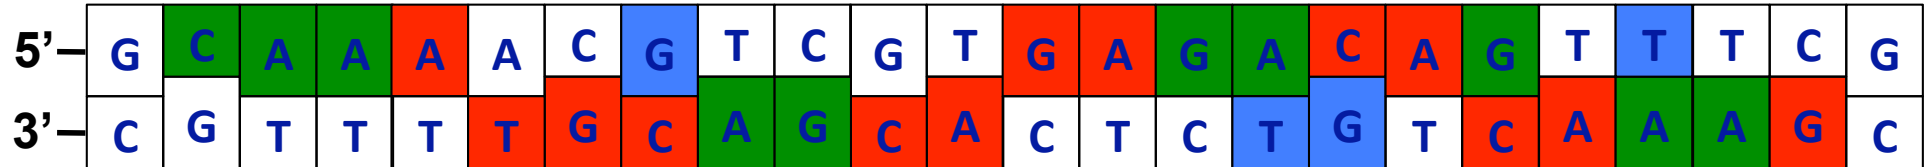

## V2V3 Mg<sup>2+</sup>

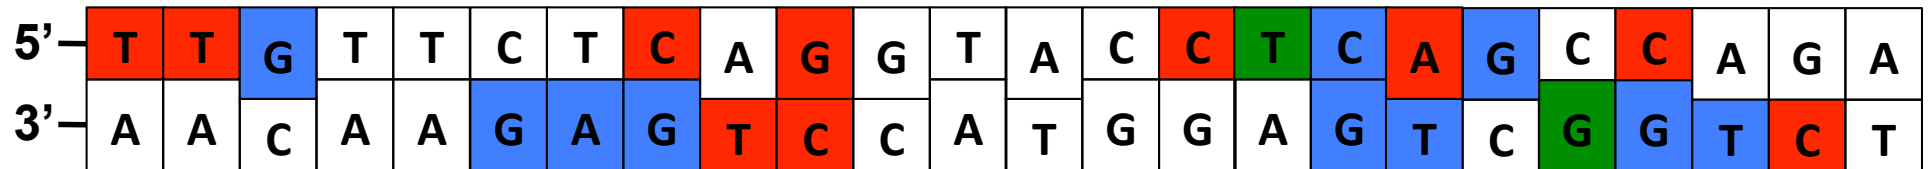

## V2(K7E-G19S)/V3(E8K) Ca<sup>2+</sup>

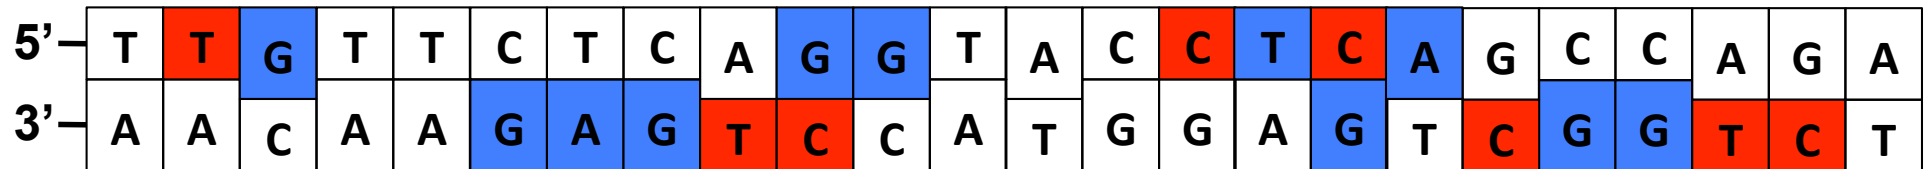

## scV3V2(G19s)

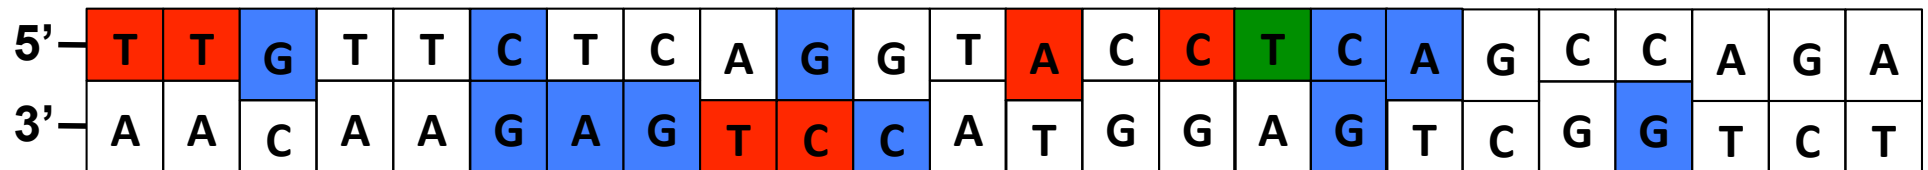

## scV3V2(G19s) Ca<sup>2+</sup>

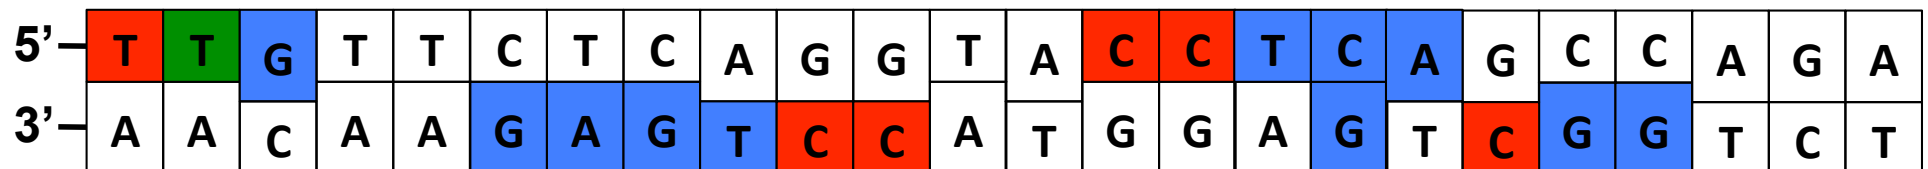

Suppl. Fig. 4

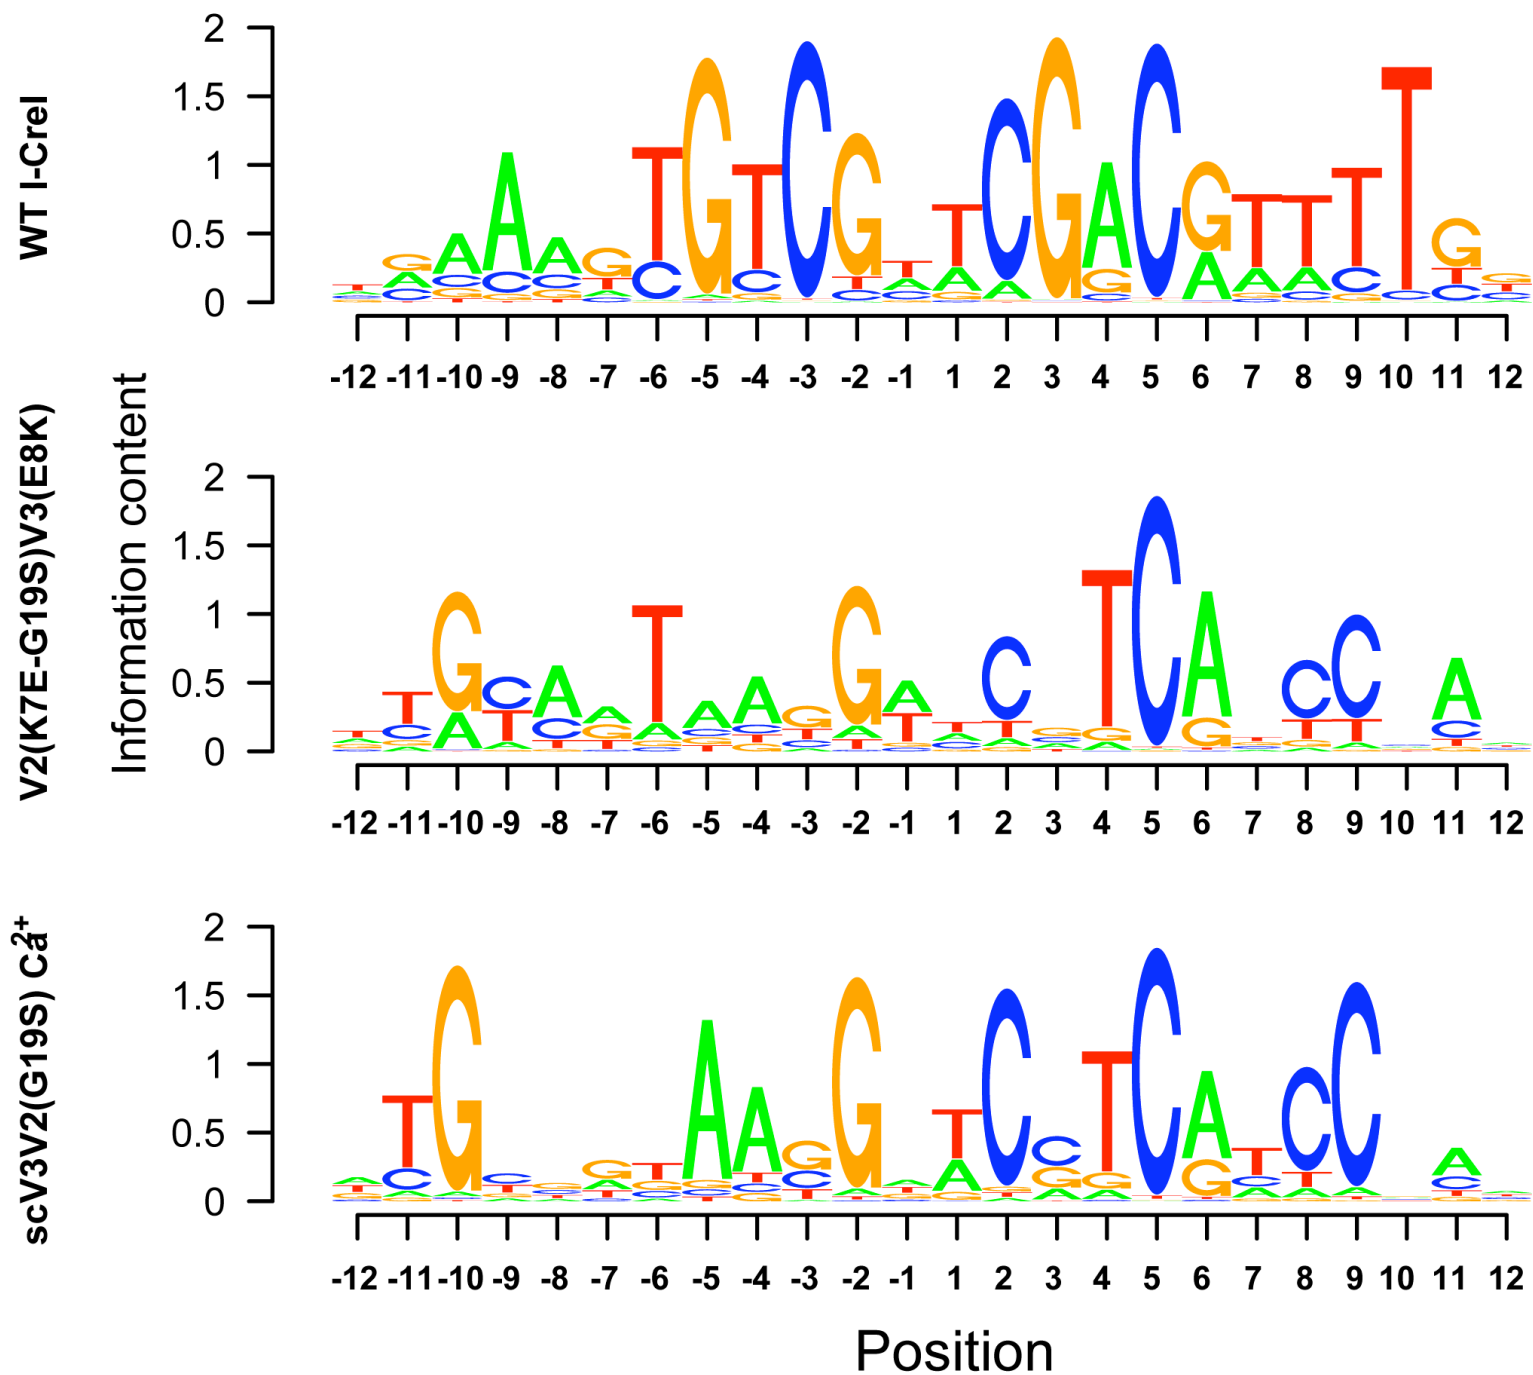



Suppl. Fig 5

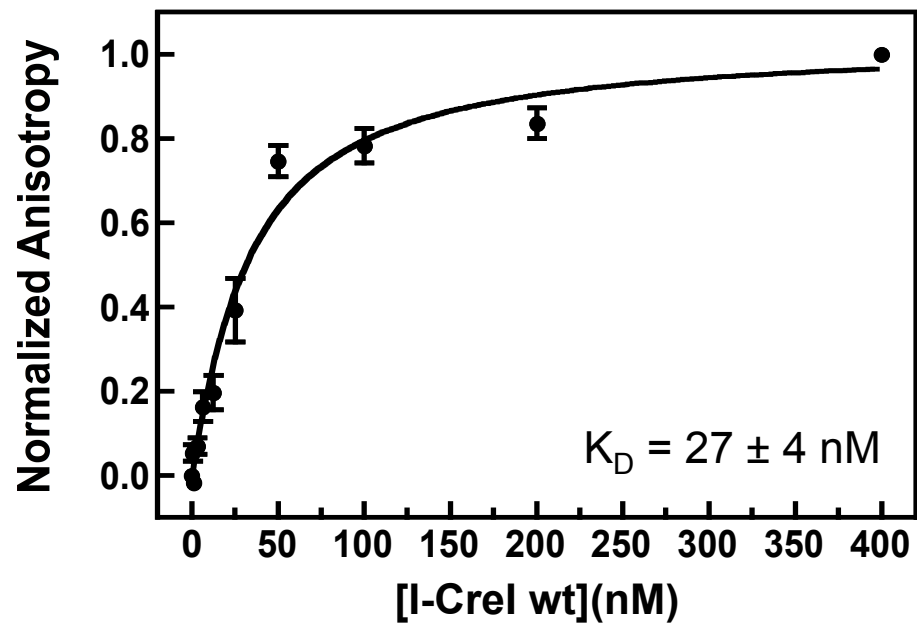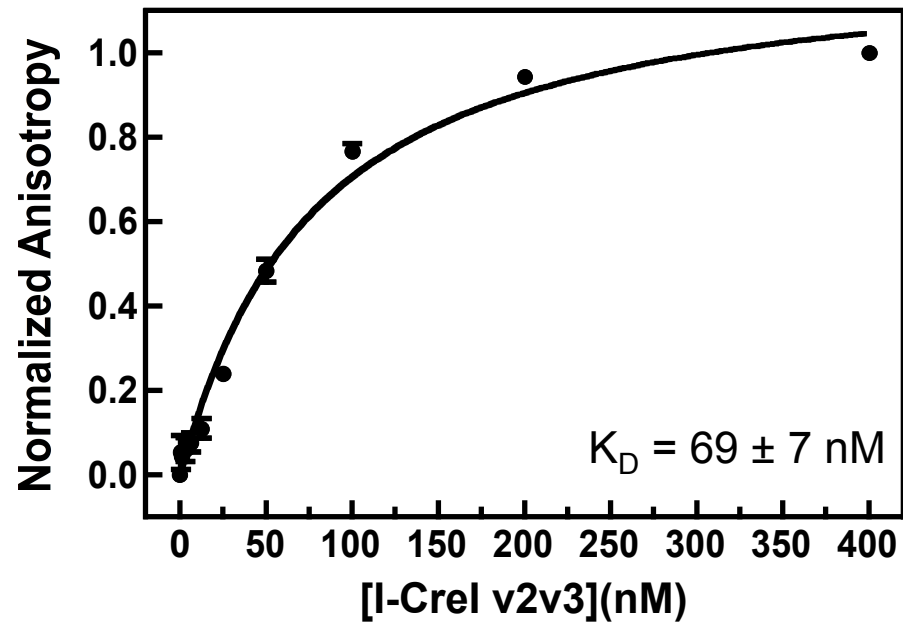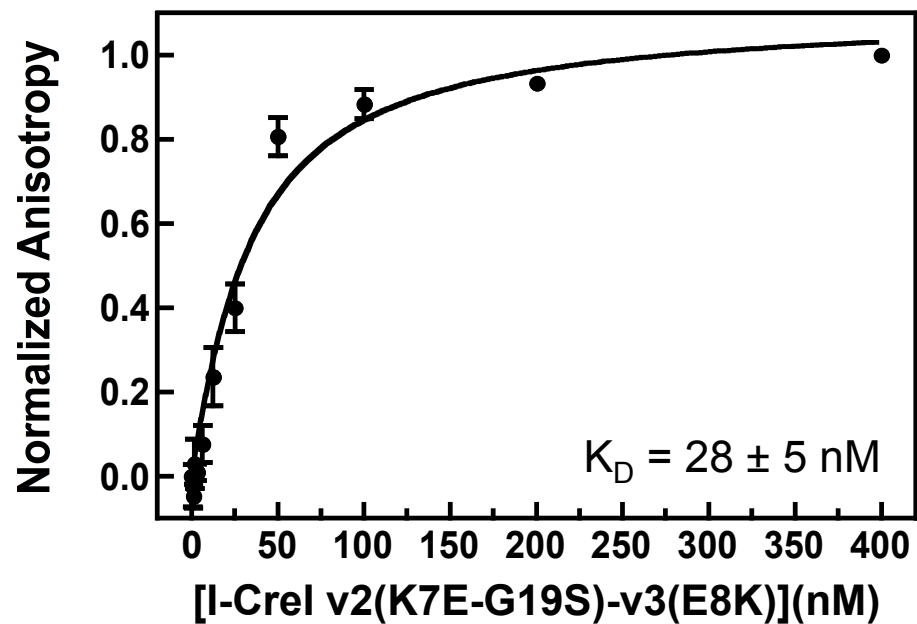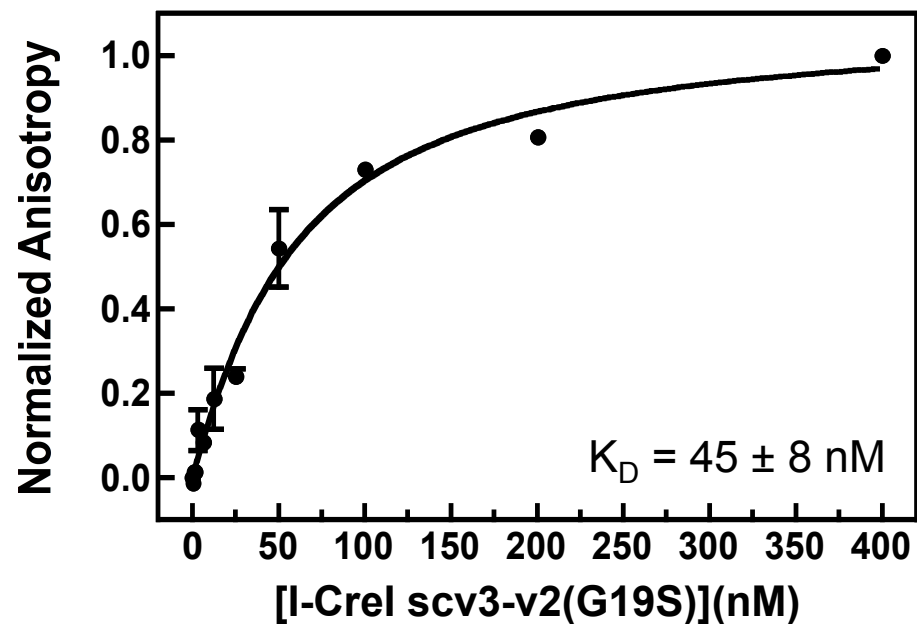

Supplement: supp_gkq801_SUPPL_FIG_R1.pdf [file supp_gkq801_SUPPL_FIG_R1.pdf]
